# Supplementary material
Source: MDPI journal article supplement (https://www.mdpi.com/1996-1073/15/11/3936)
Supplement: s1 [file s1 › energies-1701584-supplementary.pdf]

## Supporting Information

### Measurements and Modelling of Vapour-Liquid Equilibrium for (H<sub>2</sub>O + N<sub>2</sub>) and (CO<sub>2</sub> + H<sub>2</sub>O + N<sub>2</sub>) Systems at Temperatures Between (323 and 473) K and Pressures up to 20 MPa

Yolanda Sanchez-Vicente<sup>1,2\*</sup> and J P Martin Trusler<sup>1</sup>

+++++

#### Sensitivity analysis of parameters

A sensitive analysis has been carried out to see the impact of the optimised parameters in the SAFT- $\gamma$  Mie result. The approach used in this paper is One-At-A-Time (OAT). This approach consists of modifying each optimised model parameter by  $\pm 5\%$  of its optimate value and keeping all the other parameters fixed to their original values. This effect is analysed by calculating the absolute and relative average deviation between a particular property's experimental and estimated value. The definition of the average absolute deviation ( $\Delta_{AAD}$ ) is defined

$$\Delta_{AAD} = \frac{\sum(|\chi_{cal} - \chi_{exp}|)}{N} \quad (S1)$$

And the average absolute relative average deviation ( $\Delta_{AARD}$ ) is defined:

$$\Delta_{AARD} = \frac{1}{N} \sum \frac{(|\chi_{cal} - \chi_{exp}|)}{\chi_{exp}} \quad (S2)$$

Here,  $\chi_{exp}$  and  $\chi_{cal}$  are the thermophysical property obtained experimentally and calculated with SAFT- $\gamma$  Mie, respectively. N, is the number of data

#### S1. Pure nitrogen

We have modelled nitrogen as molecular group N<sub>2</sub> with two fused segments,  $v_k^* = 2$  and the attractive exponent is fixed to the London value = 6. The rest of the parameters were obtained by regression of pure nitrogen properties. The optimised parameters used in this sensitivity analysis were  $S_k$ , the shape factor,  $\sigma_{kk}$ , size of group k,  $\lambda_{kk}^r$ , the repulsive exponent and  $\epsilon_{kk}$ , the Mie potential dispersion energy. Table S1 shows the optimised and modified parameter sets. The effect of each modified parameter is analysed in four calculated properties: vapour pressures,  $p_{vap}$ , saturated liquid densities,  $\rho_{sat}$ , single-phase densities,  $\rho$ , and heat capacity,  $c_p$ , of pure nitrogen[1-3]. The  $\Delta_{AARD}$  between the experimental and calculated data obtained after modifying each mentioned parameter by  $\pm 5\%$  of its optimate value are presented in Table S1. The most affected property by the parameter perturbation was  $p_{vap}$  with  $\Delta_{AARD}$  from 13.5 % to 40.0 %.  $S_k$ ,  $\lambda_{kk}^r$  and  $\epsilon_{kk}$  are the most sensitive parameter on this property with  $\Delta_{AARD}$  26.5 %, 25.9 % and 40.0 %. The single-phase density was the least affected, with an  $\Delta_{AARD}$  of less than 3%. This might suggest that the density prediction by SAFT- $\gamma$  Mie is quite reliable.

**Table S1.** The optimised and modified group parameters used in the SAFT- $\gamma$  Mie sensitive analysis for pure nitrogen.  $S_k$ , the shape factor and  $\sigma_{kk}$  size of group k,  $\lambda_{kk}^r$ , the repulsive exponent, and  $\epsilon_{kk}$  Mie potential dispersion

energy.  $k_B$  is Boltzmann constant,  $k_B=1.380648813 \cdot 10^{-23}$  J K<sup>-1</sup>. Absolute average relative deviations ( $\Delta AARD$ ) between experimental and calculated values obtained with SAFT- $\gamma$  Mie approach.  $p_{vap}$ ,  $\rho_{sat}$ ,  $\rho$ ,  $c_p$  are vapour pressure, saturated-Liquid density, single-phase density and isobaric specific heat capacity, respectively.  $N$  denotes the number of points

|                        | $S_k$         | $\sigma_{kk}/\text{\AA}$ | $\lambda_{kk}^r$ | $(\epsilon_{kk}/k_B)/K$ | $N$ | Range $T/K$ | $p_{vap}$ | $\rho_{sat}$ | $\rho$ | $c_p$ |
|------------------------|---------------|--------------------------|------------------|-------------------------|-----|-------------|-----------|--------------|--------|-------|
| $10 \cdot \Delta AARD$ |               |                          |                  |                         |     |             |           |              |        |       |
| Optimized              | 0.7101        | 3.1779                   | 10.1087          | 73.64                   | 284 | 64-693      | 0.39      | 0.50         | 0.80   | 17.6  |
| Set 1a                 | <b>0.7456</b> | 3.1779                   | 10.1087          | 73.64                   |     |             | 20.21     | 3.39         | 1.43   | 19.79 |
| Set 1b                 | <b>0.6746</b> | 3.1779                   | 10.1087          | 73.64                   |     |             | 26.49     | 8.10         | 1.14   | 28.45 |
| Set 2a                 | 0.7101        | <b>3.3368</b>            | 10.1087          | 73.64                   |     |             | 13.50     | 13.71        | 2.84   | 18.50 |
| Set 2b                 | 0.7101        | <b>3.0190</b>            | 10.1087          | 73.64                   |     |             | 16.80     | 16.51        | 2.65   | 31.67 |
| Set 3a                 | 0.7101        | 3.1779                   | <b>10.6141</b>   | 73.64                   |     |             | 25.90     | 15.29        | 1.45   | 27.11 |
| Set 3b                 | 0.7101        | 3.1779                   | <b>9.6033</b>    | 73.64                   |     |             | 21.28     | 5.99         | 1.73   | 25.10 |
| Set 4a                 | 0.7101        | 3.1779                   | 10.1087          | <b>77.32</b>            |     |             | 26.77     | 7.52         | 1.46   | 27.22 |
| Set 4b                 | 0.7101        | 3.1779                   | 10.1087          | <b>69.96</b>            |     |             | 39.99     | 23.92        | 1.33   | 29.99 |

## S2. CO<sub>2</sub>+N<sub>2</sub> system

The unlike dispersion energy ( $\epsilon_{kk}$ ) and the repulsive exponent ( $\lambda_{kl}^r$ ) between CO<sub>2</sub> and N<sub>2</sub> groups were the optimised parameters employed in this sensitivity analysis for the CO<sub>2</sub>+N<sub>2</sub> system. The optimised and modified parameter sets are shown in Table S2. The bubble and dew point composition of carbon dioxide[4] were used to examine the impact of each modified parameter by  $\pm 5\%$  of its optimate value. Table S2 presents the  $\Delta AAD$  and  $\Delta AARD$  between the experimental and calculated data obtained after modification. As shown in Table S2,  $\epsilon_{kk}$  is the most sensitive parameter on the bubble point composition, with  $\Delta AARD$  at around 4 %, indicating that the bubble point composition is a good data set for parameter optimisation. The dew point composition deviations were almost unaffected by these small parameter changes.

**Table S2.** The optimised and modified group parameters used in the SAFT- $\gamma$  Mie sensitive analysis for the CO<sub>2</sub>+N<sub>2</sub> system. Unlike group dispersion interaction energies,  $\epsilon_{kk}$ , repulsive exponent,  $\lambda_{kl}^r$  and  $k_B$  is Boltzmann constant,  $k_B=1.380648813 \cdot 10^{-23}$  J K<sup>-1</sup>. Absolute average deviations ( $\Delta AAD$ ) and absolute average relative deviations ( $\Delta AARD$ ) between experimental and calculated values obtained with SAFT- $\gamma$  Mie approach. The subscript x and y indicate bubble and dew point molar fraction composition of CO<sub>2</sub>, respectively.  $N$  denotes the number of points

| System    | group, $k$      | Group $l$      | $(\epsilon_{kk}/k_B)/K$ | $\lambda_{kl}^r$ | $N$ | Range $T/K$ | $\Delta AAD_x$ | $\Delta AAD_y$ | $\Delta AARD_x$ | $\Delta AARD_y$ |
|-----------|-----------------|----------------|-------------------------|------------------|-----|-------------|----------------|----------------|-----------------|-----------------|
| Optimated | CO <sub>2</sub> | N <sub>2</sub> | 151.9                   | 20.27            | 68  | 218-288     | 0.017          | 0.023          | 1.5             | 2.1             |
| Set 1a    |                 |                | 159.5                   | 20.27            |     |             | 0.044          | 0.023          | 4.0             | 2.1             |
| Set 1b    |                 |                | 144.3                   | 20.27            |     |             | 0.043          | 0.028          | 3.9             | 2.6             |
| Set 2a    |                 |                | 151.9                   | 21.28            |     |             | 0.022          | 0.025          | 2.0             | 2.3             |
| Set 2a    |                 |                | 151.9                   | 19.26            |     |             | 0.021          | 0.023          | 1.9             | 2.1             |

### S3. H<sub>2</sub>O+N<sub>2</sub> system

Only unlike dispersion energy ( $\epsilon_{kk}$ ) between H<sub>2</sub>O and N<sub>2</sub> groups was employed in this sensitivity analysis for the H<sub>2</sub>O+N<sub>2</sub> system. The impact of modifying this parameter by  $\pm 5\%$  of its optimum value was measured in the deviations of dew and bubble point composition of nitrogen obtained in this work and presented in Table S3. As seen in the table, increasing the value of this parameter by 5% has little effect on the deviation of the bubble and dew point compositions. Whereas reducing the energy by 5% has a considerable influence on both compositions. This might indicate that we need more data to determine the effect of these parameters on the mole fraction composition.

The sensitivity analysis results should be taken with caution because the apparent sensitivity of the model for a given parameter depends on the selected property, the number of data, and the optimised value. It should be noted that the OAT model is the simplest approach for sensitivity analysis. It only addresses sensitivity to the local point chosen, not the complete parameter distribution.

Table S3. The optimised and modified group parameters used in the SAFT- $\gamma$  Mie sensitive analysis for the CO<sub>2</sub>+N<sub>2</sub> system. Unlike group dispersion interaction energies,  $\epsilon_{kk}$  and  $k_B$  is Boltzmann constant,  $k_B=1.380648813 \cdot 10^{-23}$  J K<sup>-1</sup>. Absolute average deviations ( $\Delta_{AAD}$ ) and absolute average relative deviations ( $\Delta_{AARD}$ ) between experimental and calculated values obtained with SAFT- $\gamma$  Mie approach. The subscript x and y indicate bubble and dew point molar fraction composition of N<sub>2</sub>, respectively. N denotes the number of points

| System    | group, $k$       | Group $l$      | $(\epsilon_{kk}/k_B)/K$ | $N$ | Range $T/K$ | $\Delta_{AADy}$ | $\Delta_{AADx}$ | $\Delta_{AARDy}$ | $\Delta_{AARDx}$ |
|-----------|------------------|----------------|-------------------------|-----|-------------|-----------------|-----------------|------------------|------------------|
| Optimated | H <sub>2</sub> O | N <sub>2</sub> | 126.59                  | 50  | 323-423     | 0.00014         | 0.008           | 25               | 1.1              |
| Set 1a    |                  |                | 132.92                  |     |             | 0.00020         | 0.010           | 21               | 1.4              |
| Set 1b    |                  |                | 120.26                  |     |             | 0.00028         | 0.067           | 70               | 9.9              |

1. Nowak, P.; Kleinrahm, R.; Wagner, W., Measurement and Correlation of the (P, q, T) Relation of Nitrogen I. The Homogeneous Gas and Liquid Regions in the Temperature Range from 66 K to 340 K at Pressures up to 12 MPa. *Journal of Chemical Thermodynamics - J CHEM THERMODYN* **1997**, 29, 1137-1156. 75
2. Zolghadr, A.; Riazi, M.; Escrochi, M.; Ayatollahi, S., Investigating the Effects of Temperature, Pressure, and Paraffin Groups on the N<sub>2</sub> Miscibility in Hydrocarbon Liquids using the Interfacial Tension Measurement Method. *Industrial & Engineering Chemistry Research* **2013**, 52, (29), 9851-9857. 80
3. van Kasteren, P. H. G.; Zeldenrust, H., A Flow Calorimeter for Condensable Gases at Low Temperatures and High Pressures. 2. Compilation of Experimental Results and Comparison with Predictions Based on a Modified Redlich-Kwong Equation of State. *Industrial & Engineering Chemistry Fundamentals* **1979**, 18, (4), 339-345. 81
4. Fandiño, O.; Trusler, J. P. M.; Vega-Maza, D., Phase behavior of (CO<sub>2</sub>+H<sub>2</sub>) and (CO<sub>2</sub>+N<sub>2</sub>) at temperatures between (218.15 and 303.15)K at pressures up to 15MPa. *International Journal of Greenhouse Gas Control* **2015**, 36, 78-92.
